# Supplementary material for: Altitudinal variation in impacts of snow cover, reservoirs and precipitation seasonality on monthly runoff in Tibetan Plateau catchments
Source: Copernicus journal article supplement (doi:10.5194/hess-2024-401), 2025-03-19
Supplement: Supplementary file 1 [file hess-2024-401-supplement.pdf]

## Supplementary material for

### **Altitudinal variation in impacts of snow cover, reservoirs and precipitation seasonality on monthly runoff in Tibetan Plateau catchments**

Nan Wu<sup>a,b,c,f</sup>, Ke Zhang<sup>a,b,c,d,e,\*</sup>, Amir Naghibi<sup>f</sup>, Hossein Hashemi<sup>f</sup>, Zhongrui Ning<sup>b,c</sup>, Jerker Jarsjö<sup>g</sup>

5 <sup>a</sup>*The National Key Laboratory of Water Disaster Prevention, Hohai University, Nanjing, Jiangsu, 210024, China*

<sup>b</sup>*Yangtze Institute for Conservation and Development, Hohai University, Nanjing, Jiangsu, 210024, China*

<sup>c</sup>*College of Hydrology and Water Resources, Hohai University, Nanjing, Jiangsu, 210024, China*

10 <sup>d</sup>*China Meteorological Administration Hydro-Meteorology Key Laboratory, Hohai University, Nanjing, Jiangsu, 210024, China*

<sup>e</sup>*Key Laboratory of Water Big Data Technology of Ministry of Water Resources, Hohai University, Nanjing, Jiangsu, 210024, China*

<sup>f</sup>*Division of Water Resources Engineering, LTH, Lund University, Lund, 22100, Sweden*

<sup>g</sup>*Department of Physical Geography, Stockholm University, Stockholm, 10691, Sweden;*

15

\* Corresponding author at: The National Key Laboratory of Water Disaster Prevention, Hohai University, Nanjing, Jiangsu, 210098, China

E-mail address: kzhang@hhu.edu.cn (Ke Zhang)

20        The relative proportions of hydrological variables reflect their importance in hydrological  
 processes, as shown in Figure S1. As both  $\Delta S'$  and  $R$  exhibited negative values (Fig. 3), their  
 absolute values were used in calculating the relative proportions, ensuring the relative proportions  
 of  $P_r$ ,  $S_{melt}$ ,  $\Delta S'$ ,  $R$ , and  $E$  summed up to 1. The proportion of  $P_r$  ( $\frac{|P_r|}{|P_r| + |S_{melt}| + |\Delta S'| + |R| + |P_r|}$ )  
 increased from March to July, peaking at 50%, and decreased from August to November, with  
 25    relative proportions in January, February, and December all below 6%. On the other hand, the  
 relative proportion of  $\Delta S'$  was higher from January to March and from November to February.  $S_{melt}$   
 primarily occurred in March and April, predominantly distributed in the GZ, ZB, DF, YJ, and ZS,  
 with GZ having the highest proportion (44%). The relative proportions of  $R$  and  $E$  were generally  
 greater than 10%, with the proportion of  $R$  being small from March to June, while  $E$  was prominent  
 30    from February to May.

## Figure Captions

**Figure S1.** Mean normalized monthly magnitude of the water balance term relative to the magnitude of all water balance terms, expressed as percentage from 0% (left part of grid cells, dark colors) to 100% (right, light).

**Figure S2.** Contribution box of different factors to  $R_v$  in 10 sub-basins,  $P_r$ ,  $S_{melt}$ ,  $\Delta S'$  and  $E_0$  represent rainfall, snowmelt, water storage change except snow, and potential evapotranspiration, respectively,  $P_r-S_{melt}$ ,  $P_r-\Delta S'$ ,  $P_r-E_0$ ,  $S_{melt}-\Delta S'$ ,  $S_{melt}-E_0$ , and  $E_0-\Delta S'$  represent their covariance.

**Figure S3.** Relationship between the monthly ratio of water demand to water supply ( $E/(P_r+S_{melt}-\Delta S')$ ) and monthly ratio of potential water demand to water supply ( $E_0/(P_r+S_{melt}-\Delta S')$ ) in the representative basin (LN, YJ and ZS).

## Table Captions

**Table S1.** Parameter  $n$  values for 10 sub-basins and the annual average evapotranspiration calculated based on the Budyko and extended Budyko framework.

**Table S2.** Location of outlet stations in 10 sub-basins and basic hydrological and meteorological information.

**Table S3.** The performance of extended Budyko framework in simulating evapotranspiration.

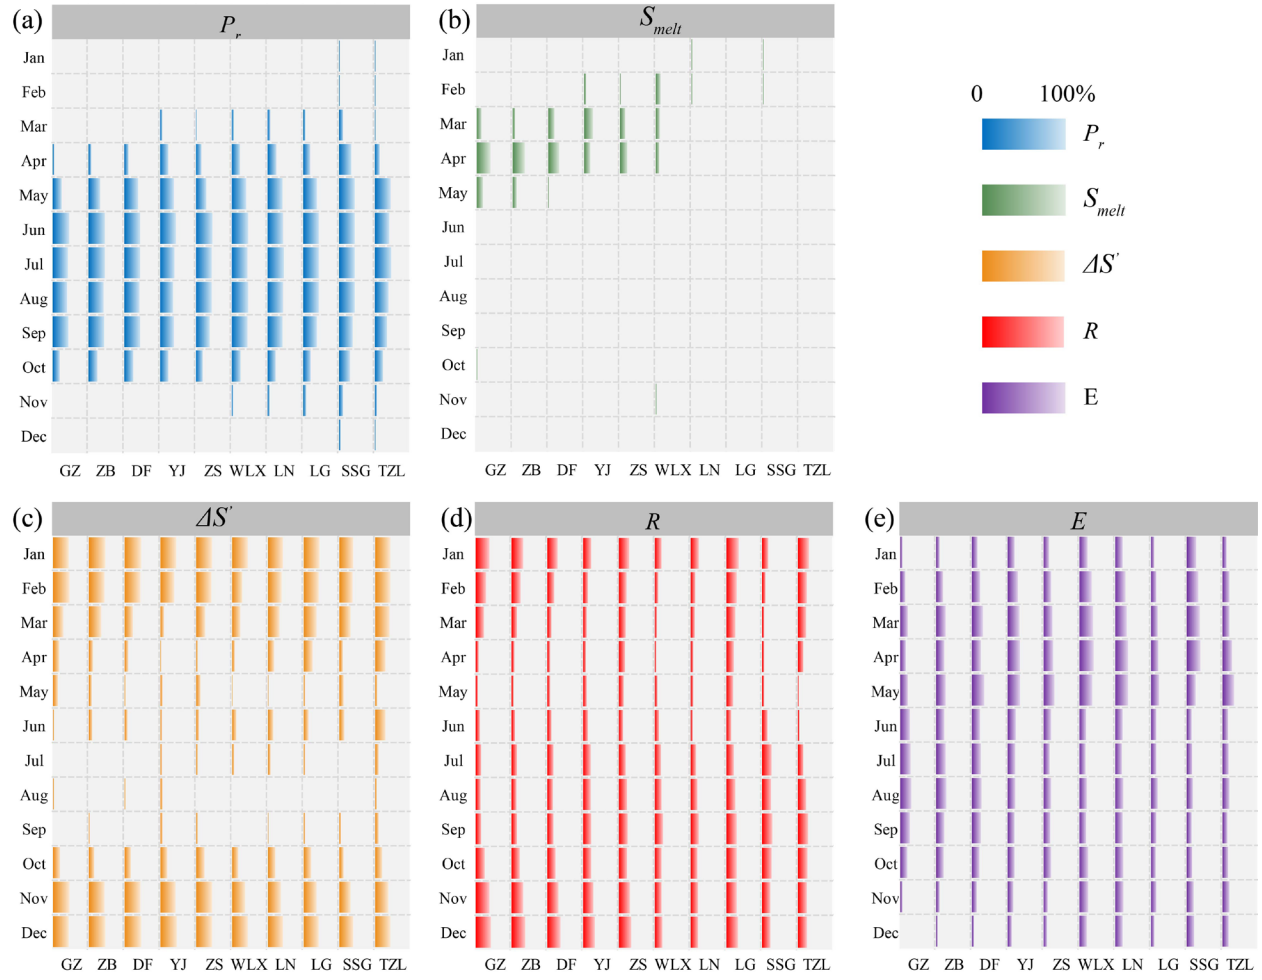

**Figure S1.** Mean normalized monthly magnitude of the water balance term relative to the magnitude of all water balance terms, expressed as percentage from 0% (left part of grid cells, dark colors) to 100% (right, light).

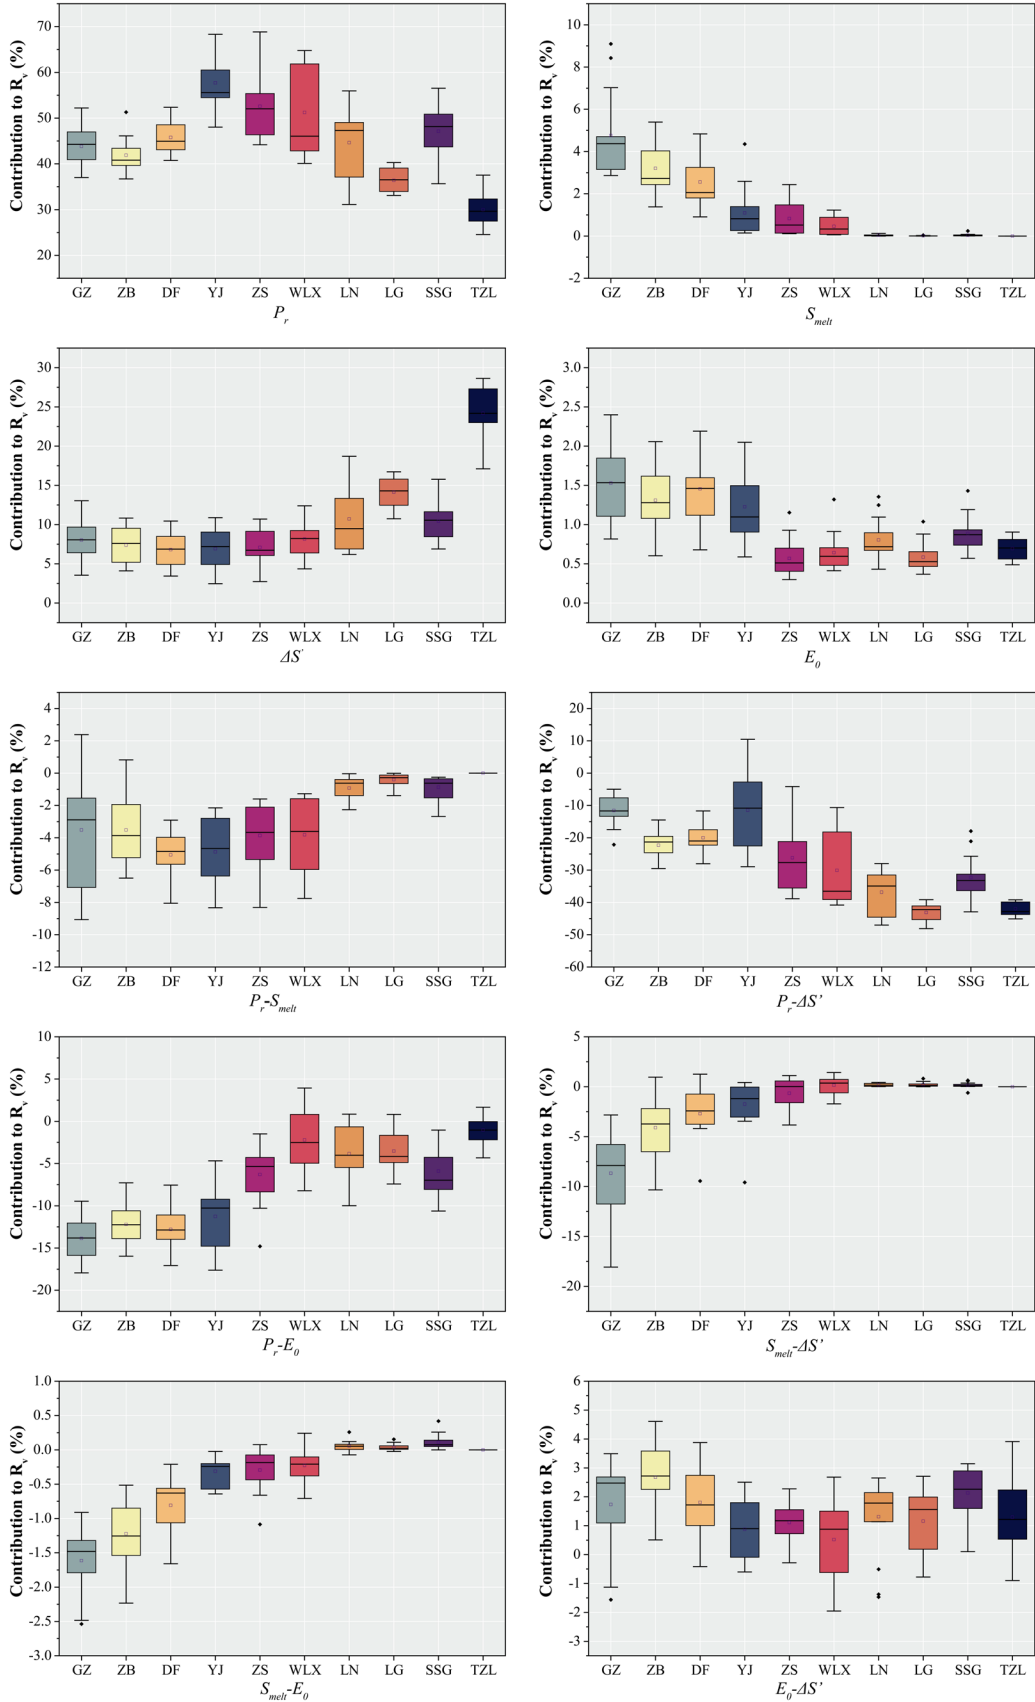

**Figure S2.** Contribution box of different factors to  $R_v$  in 10 sub-basins,  $P_r$ ,  $S_{melt}$ ,  $\Delta S'$  and  $E_0$  represent rainfall, snowmelt, water storage change except snow, and potential evapotranspiration, respectively.  $P_r-S_{melt}$ ,  $P_r-\Delta S'$ ,  $P_r-E_0$ ,  $S_{melt}-\Delta S'$ ,  $S_{melt}-E_0$ , and  $E_0-\Delta S'$  represent their covariance.

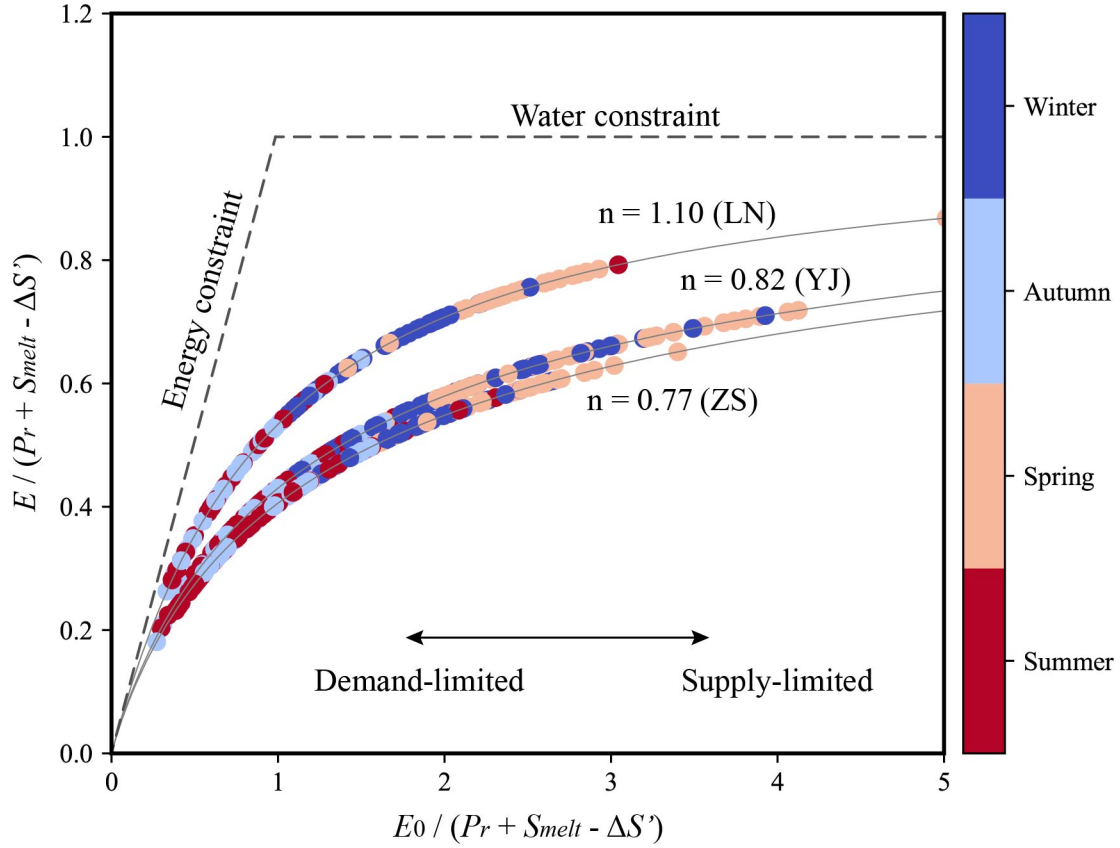

**Figure S3.** Relationship between the monthly ratio of water demand to water supply ( $E/(P_r+S_{melt}-\Delta S')$ ) and monthly ratio of potential water demand to water supply ( $E_0/(P_r+S_{melt}-\Delta S')$ ) in the representative basin (LN, YJ and ZS).

65 **Table S1.** Parameter  $n$  values for 10 sub-basins and the annual average evapotranspiration calculated based on the Budyko and extended Budyko framework.

| Basin            | GZ   | ZB   | DF   | YJ   | ZS   | LN   | WLX  | LG   | SSG  | TZL  |
|------------------|------|------|------|------|------|------|------|------|------|------|
| $n$              | 1.26 | 1.50 | 1.23 | 0.82 | 0.77 | 1.10 | 1.68 | 0.75 | 0.88 | 0.79 |
| $E_B$<br>(mm)    | 402  | 475  | 455  | 497  | 478  | 527  | 652  | 642  | 604  | 593  |
| $E_{EB}$<br>(mm) | 425  | 479  | 440  | 479  | 442  | 508  | 634  | 706  | 575  | 560  |

**Table S2.** Location of outlet stations in 10 sub-basins and basic hydrological and meteorological information.

| Number | Site Name   | Abbreviation<br>of subbasin | Latitude | Longitude | Area<br>(million<br>km <sup>2</sup> ) | Monthly<br>Streamflow<br>(mm) | Monthly<br>Precipitation<br>(mm) | Monthly<br>Temperatures<br>(°C) | Monthly Potential<br>Evapotranspiration<br>(mm) |
|--------|-------------|-----------------------------|----------|-----------|---------------------------------------|-------------------------------|----------------------------------|---------------------------------|-------------------------------------------------|
| 1      | Ganzi       | GZ                          | 31.62°   | 99.97°    | 3.27                                  | 21.45                         | 54.74                            | -1.60                           | 61.25                                           |
| 2      | Zhuba       | ZB                          | 31.43°   | 100.68°   | 0.69                                  | 24.28                         | 63.63                            | -0.45                           | 62.75                                           |
| 3      | Daofu       | DF                          | 31.03°   | 101.07°   | 0.73                                  | 28.88                         | 66.22                            | 0.73                            | 66.69                                           |
| 4      | Yajiang     | YJ                          | 30.03°   | 101.02°   | 1.89                                  | 40.96                         | 70.92                            | 2.18                            | 73.47                                           |
| 5      | Zhuosang    | ZS                          | 29.70°   | 100.38°   | 0.31                                  | 40.95                         | 68.30                            | 1.77                            | 76.10                                           |
| 6      | Luning      | LN                          | 28.45°   | 101.87°   | 3.64                                  | 38.73                         | 80.87                            | 5.95                            | 81.93                                           |
| 7      | Wulaxi      | WLX                         | 28.48°   | 101.65°   | 0.25                                  | 40.66                         | 92.78                            | 3.13                            | 72.96                                           |
| 8      | Lugu        | LG                          | 28.30°   | 102.18°   | 0.21                                  | 84.13                         | 97.20                            | 8.65                            | 78.73                                           |
| 9      | Sunshuiguan | SSG                         | 28.30°   | 102.20°   | 0.16                                  | 55.74                         | 94.93                            | 10.25                           | 81.66.                                          |
| 10     | Tongzilin   | TZL                         | 26.68°   | 101.85°   | 1.65                                  | 62.31                         | 91.58                            | 13.29                           | 99.47                                           |



**Table S3.** The performance of extended Budyko framework in simulating evapotranspiration.

| Basin | GZ   | ZB   | DF   | YJ   | ZS   | LN   | WLX  | LG   | SSG  | TZL  |
|-------|------|------|------|------|------|------|------|------|------|------|
| NSE   | 0.87 | 0.81 | 0.90 | 0.93 | 0.87 | 0.86 | 0.93 | 0.90 | 0.89 | 0.82 |
